# Supplementary material for: Randomized controlled trials: who fails run-in?
Source: PubMed Central journal article supplement (PMC4966775; doi:10.1186/s13063-016-1451-9), 2016-07-29

a. Successful completion rate, by center

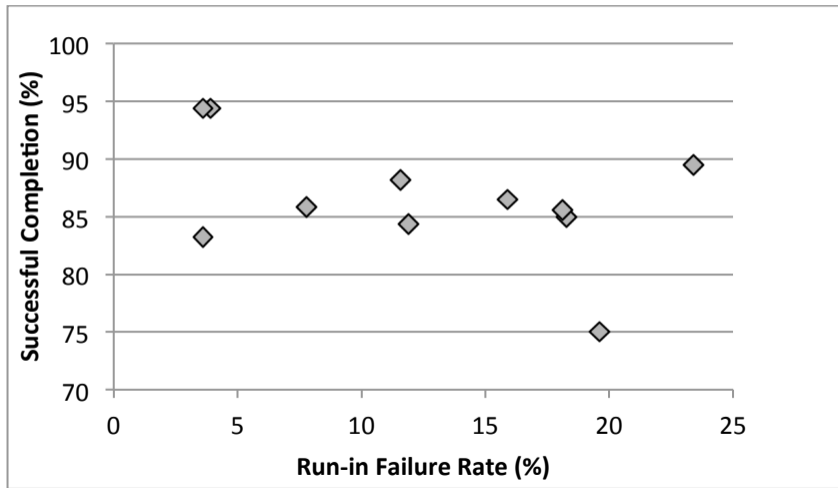

Supplement: 13063_2016_1451_MOESM5_ESM.pdf [file 13063_2016_1451_MOESM5_ESM.pdf]
